# Supplementary material for: Two-photon chiro-optical properties of gold Au25 nanoclusters
Source: Royal Society of Chemistry journal article supplement (doi:10.1039/c8cp05256e), 2018-01-01
Supplement: c8cp05256e1.pdf [file c8cp05256e1.pdf]

## Supporting Information

### Two-photon chiro-optical properties of gold Au25 nanoclusters

Joanna Olesiak-Banska,<sup>\*a</sup> Magdalena Waszkielewicz<sup>a</sup> and Marek Samoc<sup>a</sup>

<sup>a</sup>Advanced Materials Engineering and Modelling Group, Faculty of Chemistry, Wrocław University of Science and Technology, Wrocław 50-370, Poland

\*corresponding author: Joanna.olesiak@pwr.edu.pl

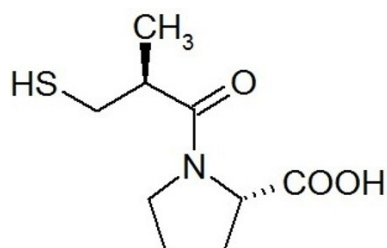

Figure S1. Structure of L-captopril.

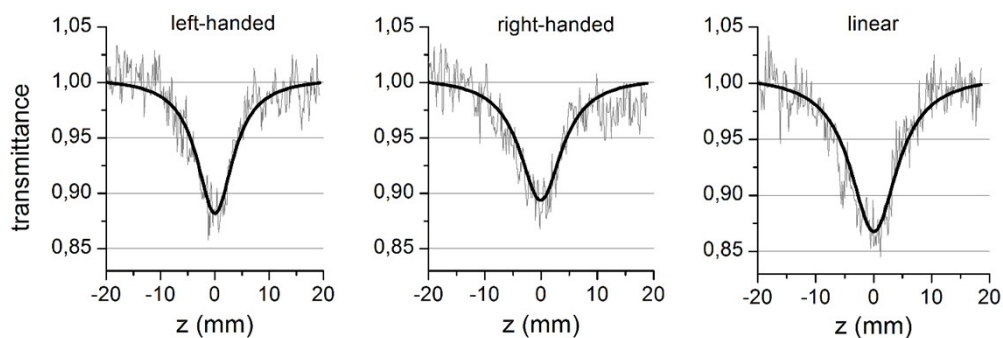

Figure S2. OA Z-scan traces of Au25 nanoclusters measured with left-handed, right-handed and linear polarization (left, right and linear, respectively). Experimental data (grey) and theoretical fits with Z-scan theory of two-photon absorption (black). The z-scan intensities were then normalized according to the results of Rhodamine solution right-handed and left-handed z-scan measurements.
